# Supplementary material
Source: PubMed Central journal article supplement (PMC8061424)
Supplement: NIHMS1689842-supplement-Supplemental_File_2.pdf [file NIHMS1689842-supplement-Supplemental_File_2.pdf]

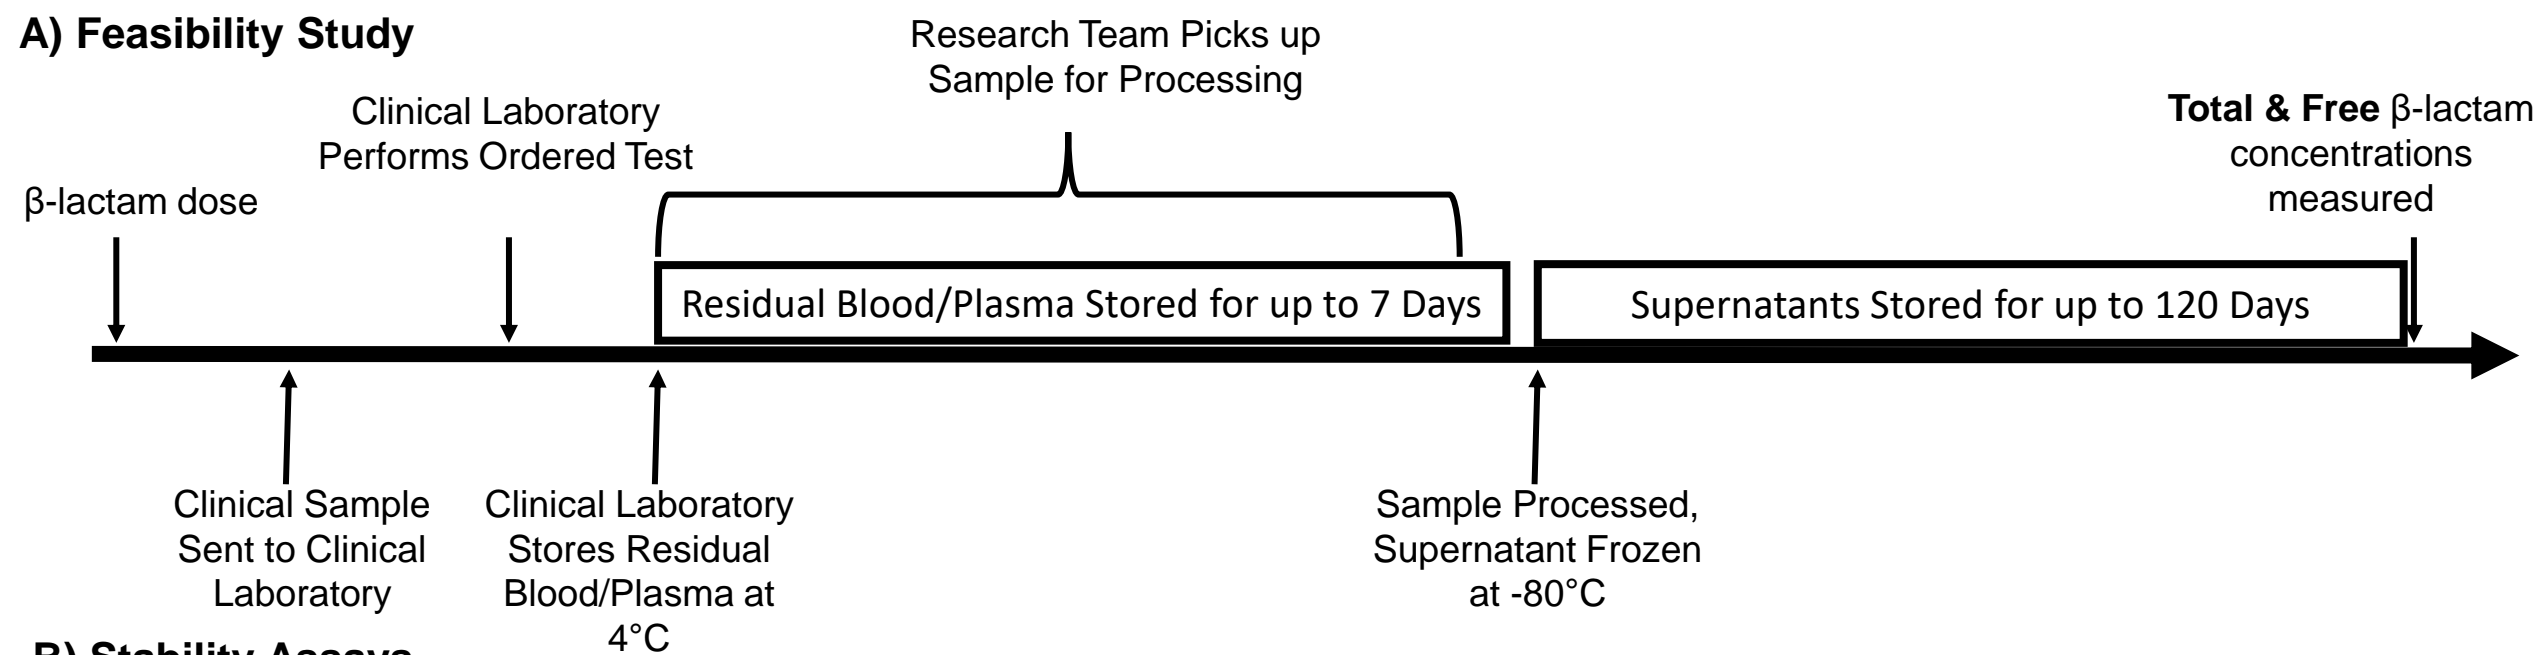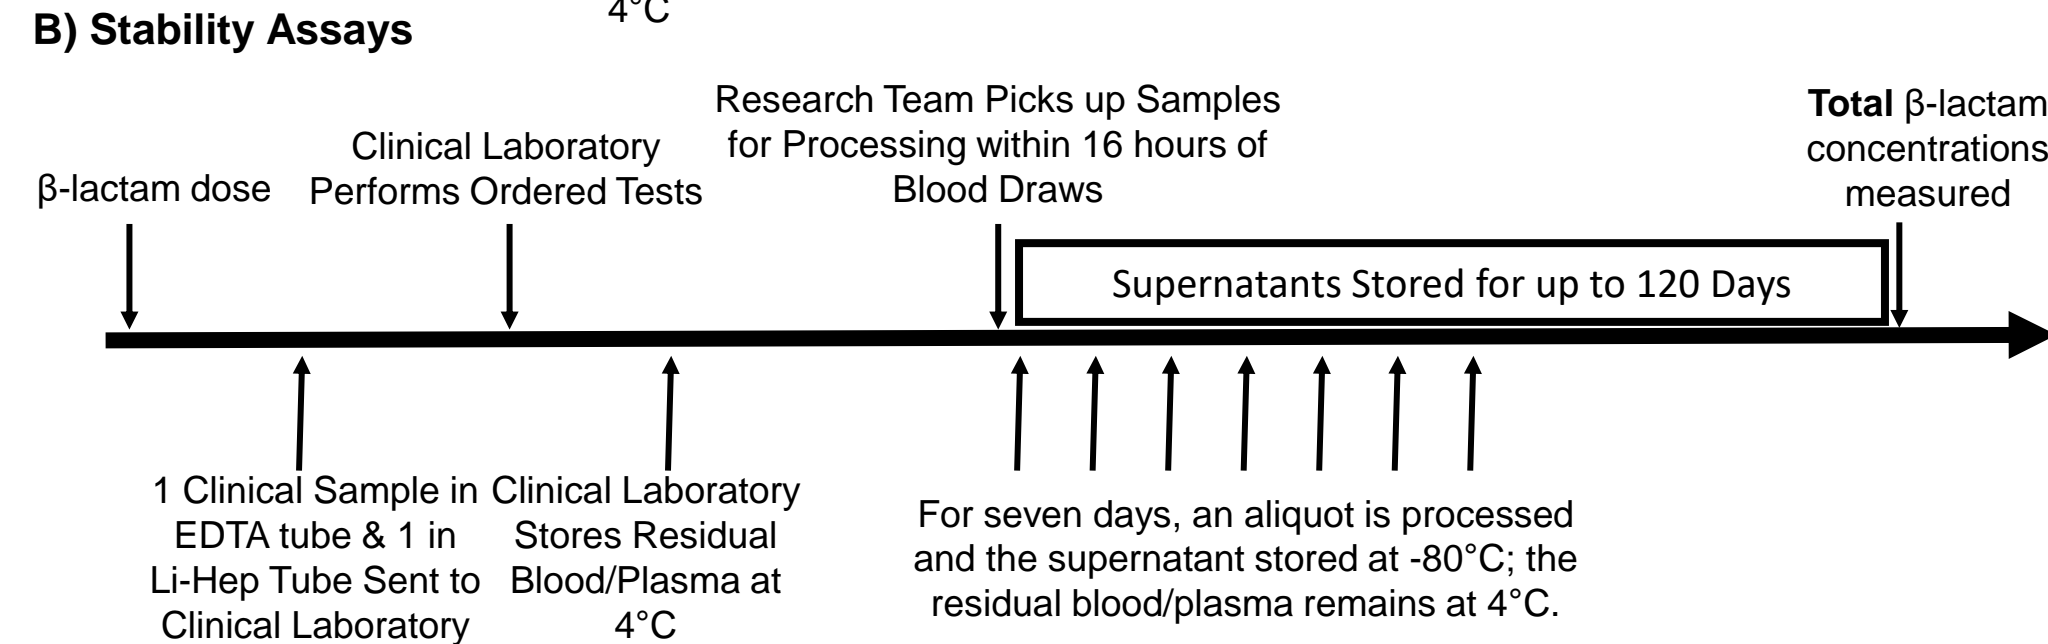

**Supplemental Figure 2: Timelines depicting drug administration, clinical sample collection, clinical laboratory test completion, residual blood storage, sample processing and drug concentration measurement for A) Feasibility Study and B) Stability Assays.** EDTA: ethylenediaminetetraacetic acid , Li-Hep: lithium-heparin
